# Supplementary material for: Liver-specific Mettl14 deletion induces nuclear heterotypia and dysregulates RNA export machinery
Source: PubMed Central journal article supplement — bioRxiv. 2024 Jun 17:2024.06.17.599413. Preprint. [Version 1] doi: 10.1101/2024.06.17.599413 (PMC11212911; doi:10.1101/2024.06.17.599413), 2024-06-17
Supplement: media-1.pdf [file media-1.pdf]

1 SUPPLEMENTARY INFORMATION  
2 FOR

3  
4 **Disruption of the N<sup>6</sup>-methyladenosine RNA modification machinery in**  
5 **hepatocytes induces nuclear heterotopia and progressive liver disease**  
6

7 Keith A Berggren<sup>1</sup>, Saloni Sinha<sup>2</sup>, Aaron E Lin<sup>1</sup>, Michael P Schwoerer<sup>1</sup>, Stephanie  
8 Maya<sup>1</sup>, Abhishek Biswas<sup>1,3</sup>, Thomas R Cafiero<sup>1</sup>, Yongzhen Liu<sup>1</sup>, Hans P Gertje<sup>4</sup> Saori  
9 Suzuki<sup>1†</sup>, Andrew R. Berneshawi<sup>1‡</sup>, Sebastian Carver<sup>1</sup>, Brigitte Heller<sup>1</sup>, Nora Hassan<sup>2</sup>,  
10 Qazi Ali<sup>2</sup>, Daniel Beard<sup>1</sup>, Danyang Wang<sup>5</sup>, John M Cullen<sup>6</sup>, Ralph E Kleiner<sup>5</sup>, Nicholas  
11 A Crossland<sup>4,7</sup>, Robert E Schwartz<sup>2,8,9</sup>, Alexander Ploss<sup>1\*</sup>  
12

13 <sup>1</sup> Department of Molecular Biology, Princeton University, Princeton, NJ, USA.

14 <sup>2</sup> Department of Medicine, Weill Cornell Medicine, NY, USA.

15 <sup>3</sup> Research Computing, Office of Information Technology, Princeton University,  
16 Princeton, NJ, 08544, USA.

17 <sup>4</sup> National Emerging Infectious Diseases Laboratories, Boston University, Boston, MA,  
18 02118, USA.

19 <sup>5</sup> Department of Chemistry, Princeton University, Princeton, NJ 08544, USA.

20 <sup>6</sup> Department of Population Health and Pathobiology, North Carolina State University  
21 College of Veterinary Medicine, Raleigh, NC 27607, USA.

22 <sup>7</sup> Department of Pathology and Laboratory Medicine, Boston University Chobanian &  
23 Avedisian School of Medicine, Boston, MA, 02118, USA.

24 <sup>8</sup> Department of Physiology, Biophysics, and Systems Biology, Weill Cornell Medicine,  
25 NY, USA.

26 <sup>9</sup> Department of Biomedical Engineering, Cornell University, Ithaca, NY, USA.

27 \* **Corresponding Author ([aploss@princeton.edu](mailto:aploss@princeton.edu))**

28 † Present address: Department of Microbiology and Immunology, Hokkaido University,  
29 Japan.

30 ‡ Present address: Stanford University School of Medicine, Stanford, CA, USA.  
31

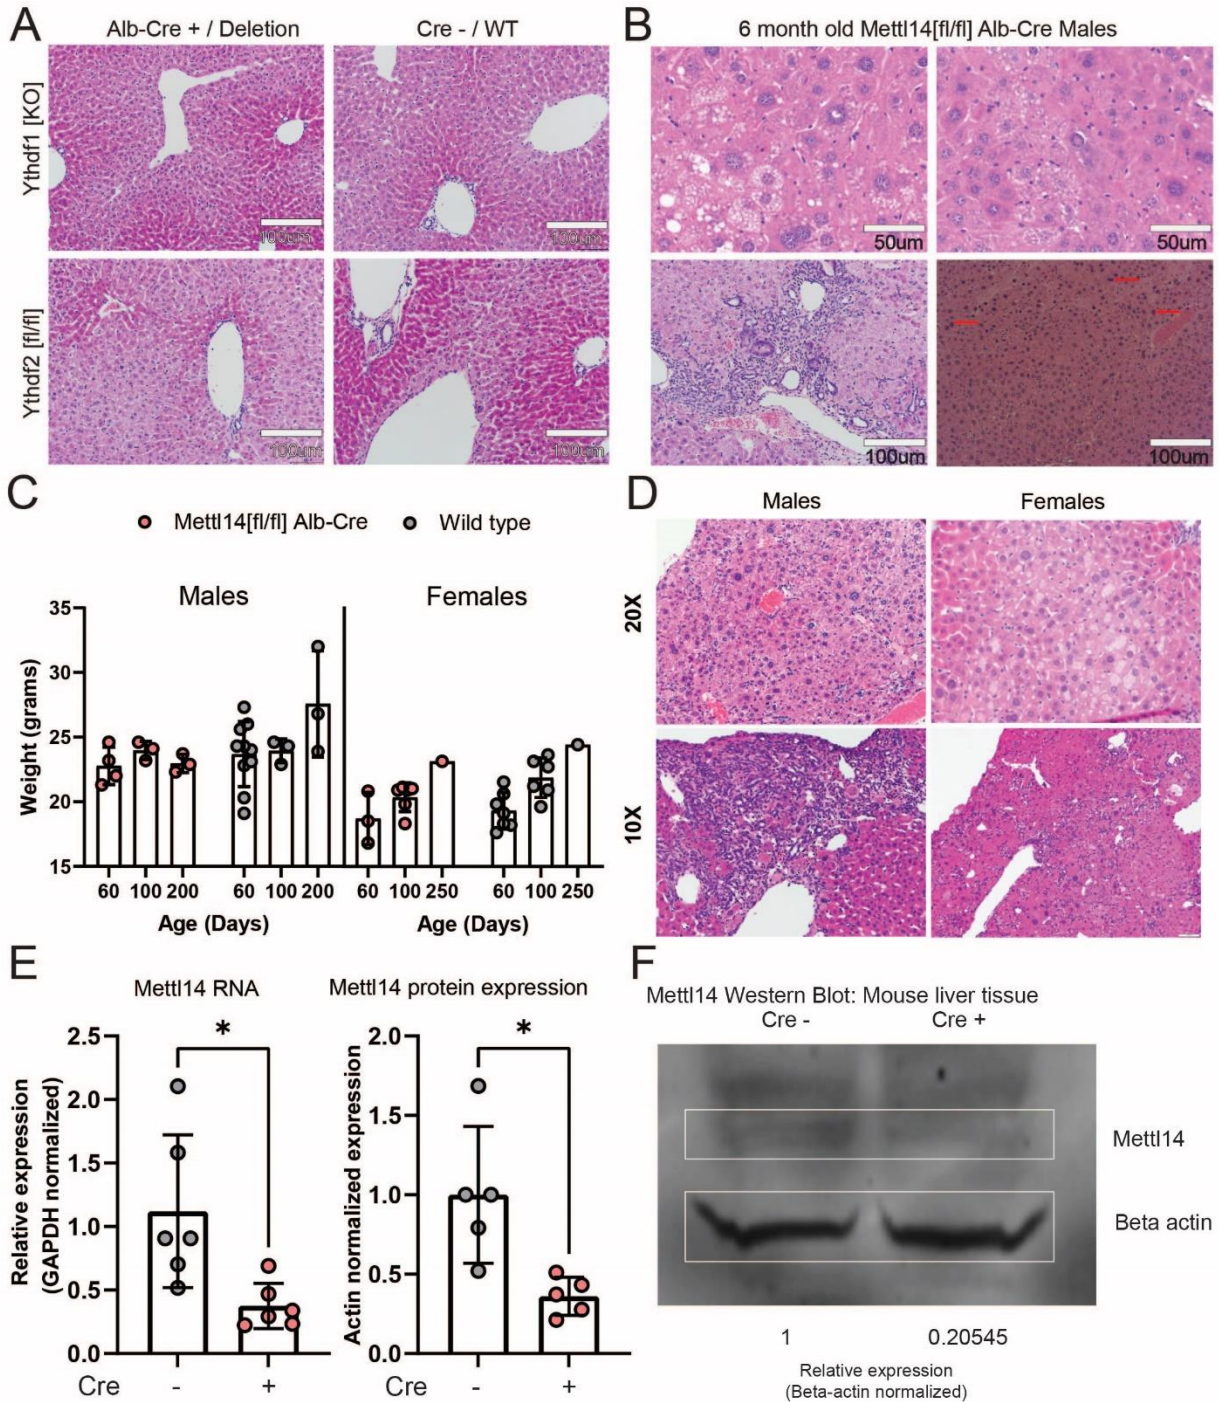

**Supplemental Fig. 1: Mettl14[fl/fl] Alb-Cre mice display a sexually dimorphic liver injury phenotype, reduced weights, and reduced Mettl14 RNA and protein levels.**

Unlike dual Ythdf1/Ythdf2, neither Ythdf1 or Ythdf2 deletion alone leads to significant histological changes in liver tissue (A). The observed injury phenotype in Mettl14 Males continues to progress with age, leading to marked steatosis (B, top), fibrosis (B, bottom left), and high levels of nuclear heterotopia (B, bottom right, red arrows). Male and female liver specific Mettl14 deletion mice show generally reduced weight throughout adulthood compared to C57BL/6 mice (C). Males show more pronounced liver damage than females, as shown by representative images (D). Reverse-transcription qPCR and western blot quantification both confirm significant reduction of Mettl14 expression by ~50% in our Mettl14[fl/fl] Alb-Cre model (E,F).

33  
34  
35  
36  
37  
38  
39  
40  
41  
42

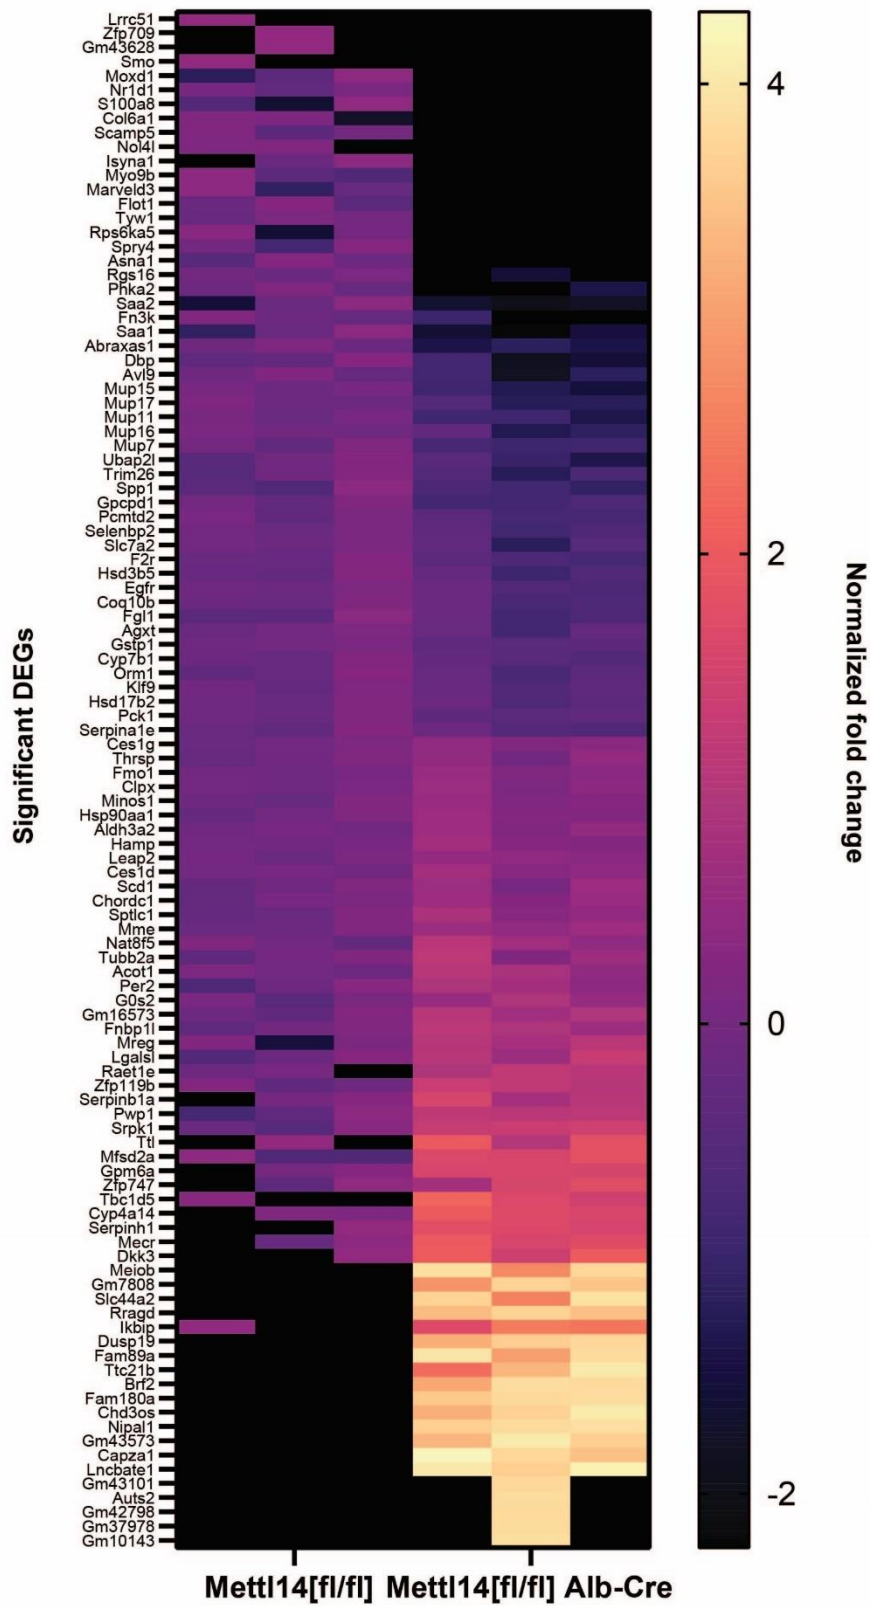

44 **Supplemental Fig. 2: Heatmap of expression changes in DEGs between wild-type and Mettl14[f/f] Alb-Cre expressing**  
45 **mice.** RNAseq count data for DEGs determined by DeSEQ2 was normalized to the mean of wild-type samples. Values were then  
46 plotted by taking the base-10 log. Where transcripts were not detected, boxes are colored black, and where values exceeded 4,  
47 values are binned into one group with the same light-yellow color at the top of the scale bar.  
48

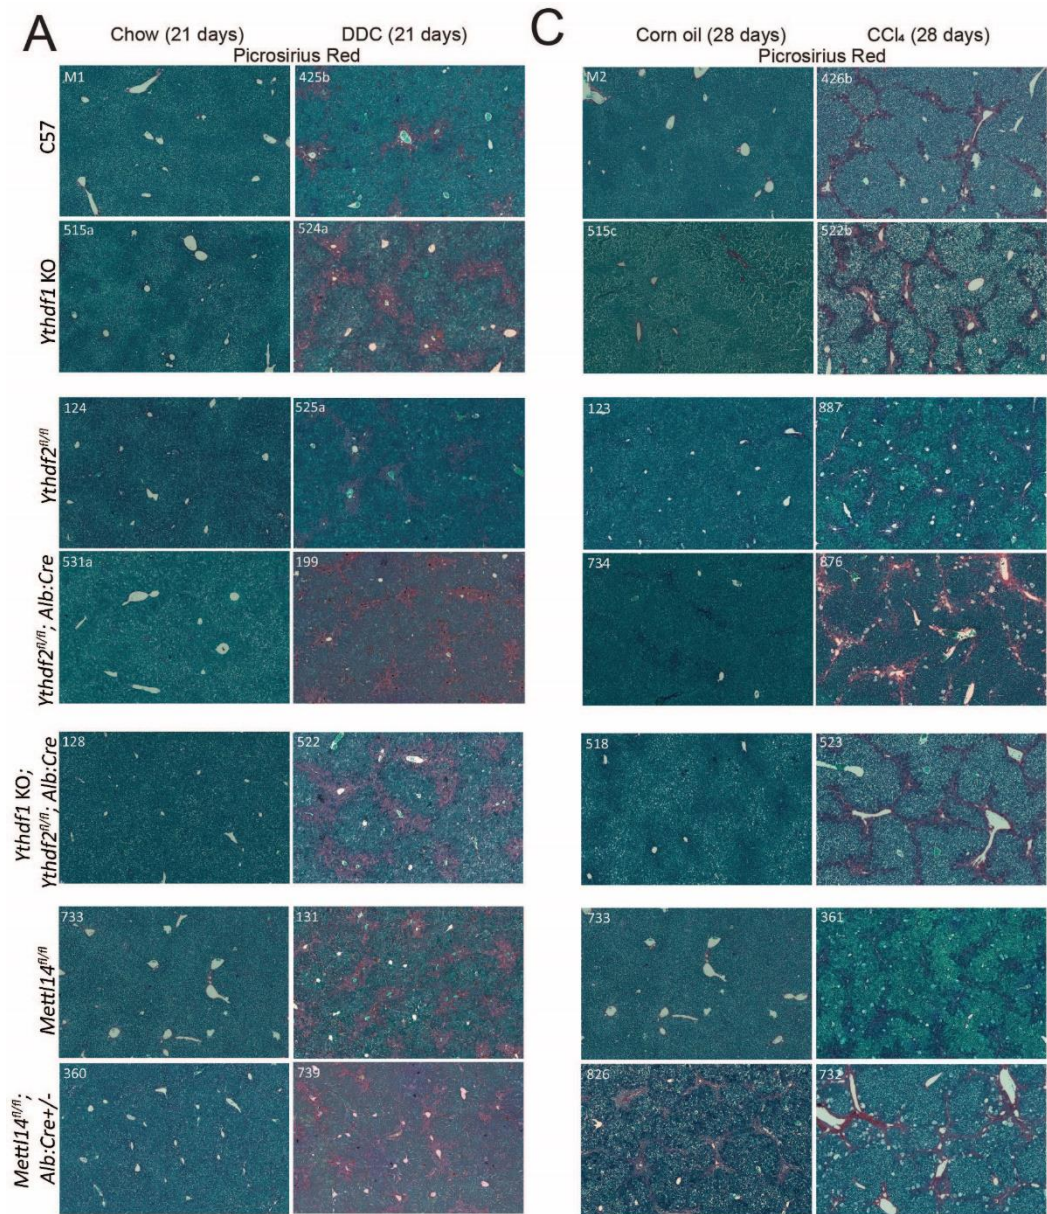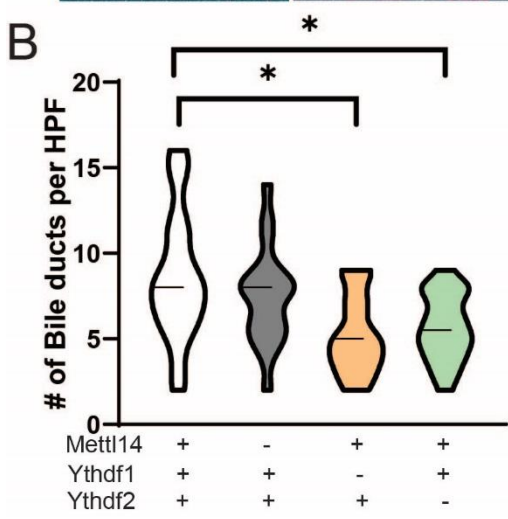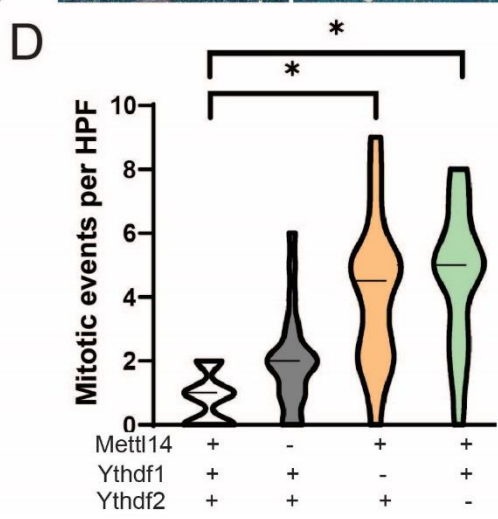

50 **Supplemental Fig. 3: Liver damage is exacerbated in Ythdf1, Ythdf2 and Mettl14 deficient liver tissue**  
 51 Deletion of Ythdf1 and Ythdf2 both separately contribute to worsened injury response to DDC as seen by picosirius red staining to  
 52 show areas of fibrosis (A). Bile duct regeneration after blockage by DDC treatment is impaired significantly in Ythdf1 and Ythdf2  
 53 deletion mice (N=20 fields of view: 4 fields of view for each of 5 animals for all groups) (B). Response to CCl<sub>4</sub> is worsened in Ythdf1  
 54 and Ythdf2 mice leading to further liver fibrosis (C). This direct injury to hepatocytes leads to significantly increased rates of cell  
 55 division, with higher mitotic events captured by histology imaging (N=20 fields of view: 4 fields of view for each of 5 animals for all  
 56 groups) (D).

57  
 58

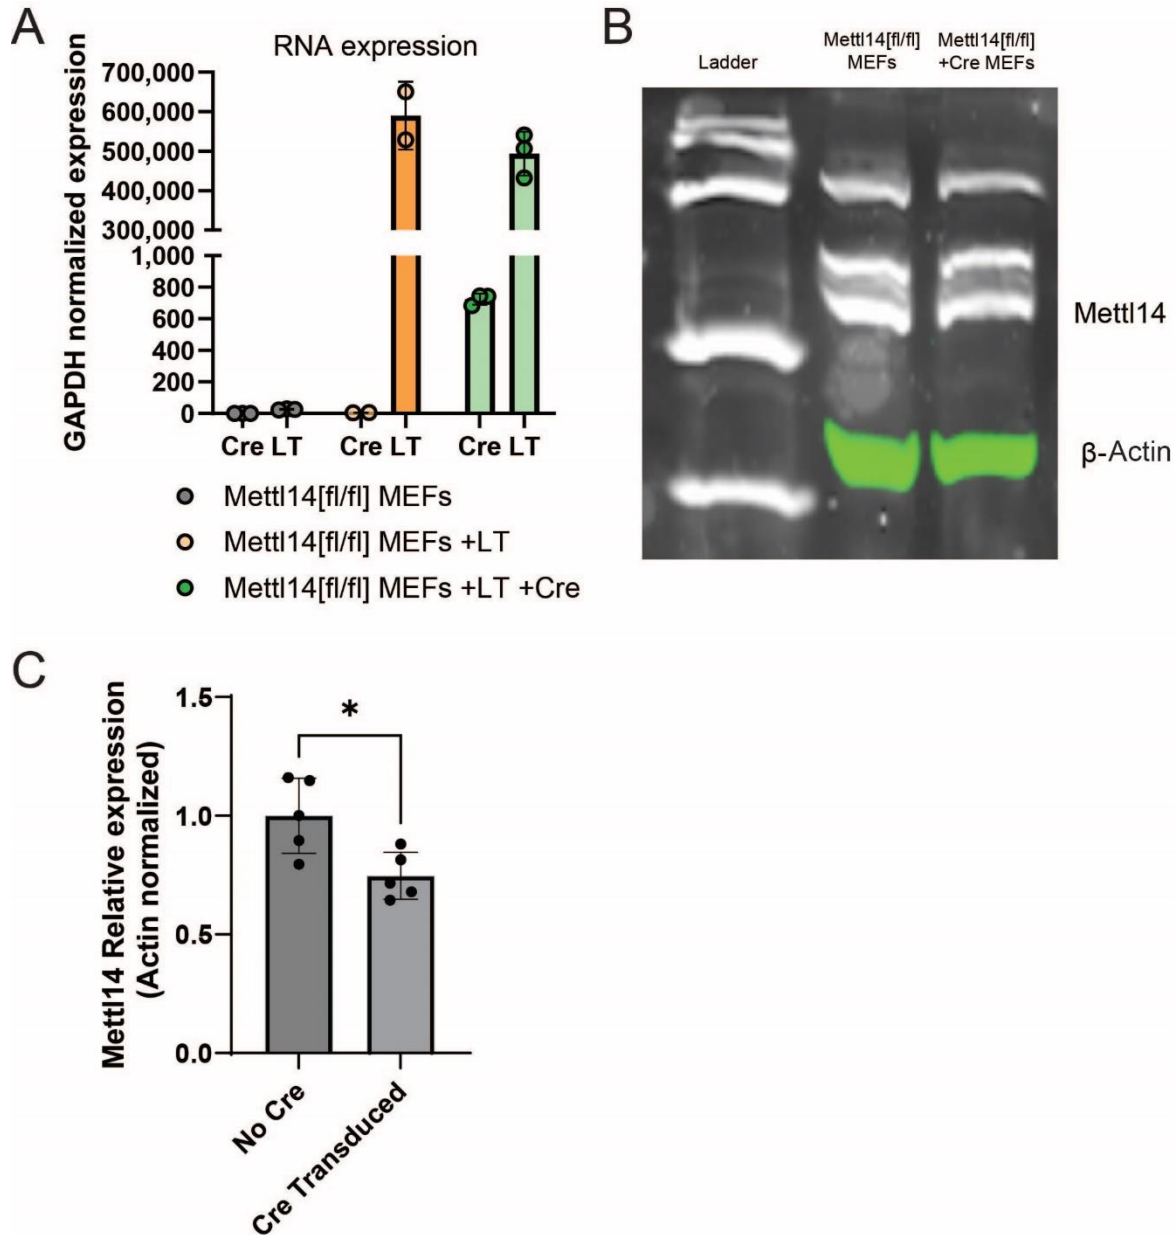

59 **Supplemental Fig. 4: Confirmation of Mettl14 expression changes in mouse embryonic fibroblasts**  
 60 RT-qPCR confirmed that SV40 large T antigen expression and Cre expression were present in transduced MEF cells (A). Western  
 61 blot confirmed protein expression changes of Mettl14 in Cre-transduced MEF cells (B), with quantification of multiple replicates  
 62 showing ~25% reduction in Mettl14 levels (C).  
 63  
 64
