# Supplementary material for: Liver-specific Mettl14 deletion induces nuclear heterotypia and dysregulates RNA export machinery
Source: PubMed Central journal article supplement — bioRxiv. 2024 Jun 17:2024.06.17.599413. Preprint. [Version 1] doi: 10.1101/2024.06.17.599413 (PMC11212911; doi:10.1101/2024.06.17.599413), 2024-06-17
Supplement: media-3.pdf [file media-3.pdf]

| Gene ID | Gene Name    | Gene Description | Chromosome | Start (kb) | End (kb) | Strand | Transcript ID | Transcript Name | Transcript Description |
|---------|--------------|------------------|------------|------------|----------|--------|---------------|-----------------|------------------------|
| 100     | LOC101928001 | LOC101928001     | 10         | 21.28      | 21.27    | +      | LOC101928001  | LOC101928001    | LOC101928001           |
| 101     | LOC101928002 | LOC101928002     | 10         | 21.27      | 21.26    | +      | LOC101928002  | LOC101928002    | LOC101928002           |
| 102     | LOC101928003 | LOC101928003     | 10         | 21.26      | 21.25    | +      | LOC101928003  | LOC101928003    | LOC101928003           |
| 103     | LOC101928004 | LOC101928004     | 10         | 21.25      | 21.24    | +      | LOC101928004  | LOC101928004    | LOC101928004           |
| 104     | LOC101928005 | LOC101928005     | 10         | 21.24      | 21.23    | +      | LOC101928005  | LOC101928005    | LOC101928005           |
| 105     | LOC101928006 | LOC101928006     | 10         | 21.23      | 21.22    | +      | LOC101928006  | LOC101928006    | LOC101928006           |
| 106     | LOC101928007 | LOC101928007     | 10         | 21.22      | 21.21    | +      | LOC101928007  | LOC101928007    | LOC101928007           |
| 107     | LOC101928008 | LOC101928008     | 10         | 21.21      | 21.20    | +      | LOC101928008  | LOC101928008    | LOC101928008           |
| 108     | LOC101928009 | LOC101928009     | 10         | 21.20      | 21.19    | +      | LOC101928009  | LOC101928009    | LOC101928009           |
| 109     | LOC101928010 | LOC101928010     | 10         | 21.19      | 21.18    | +      | LOC101928010  | LOC101928010    | LOC101928010           |
| 110     | LOC101928011 | LOC101928011     | 10         | 21.18      | 21.17    | +      | LOC101928011  | LOC101928011    | LOC101928011           |
| 111     | LOC101928012 | LOC101928012     | 10         | 21.17      | 21.16    | +      | LOC101928012  | LOC101928012    | LOC101928012           |
| 112     | LOC101928013 | LOC101928013     | 10         | 21.16      | 21.15    | +      | LOC101928013  | LOC101928013    | LOC101928013           |
| 113     | LOC101928014 | LOC101928014     | 10         | 21.15      | 21.14    | +      | LOC101928014  | LOC101928014    | LOC101928014           |
| 114     | LOC101928015 | LOC101928015     | 10         | 21.14      | 21.13    | +      | LOC101928015  | LOC101928015    | LOC101928015           |
| 115     | LOC101928016 | LOC101928016     | 10         | 21.13      | 21.12    | +      | LOC101928016  | LOC101928016    | LOC101928016           |
| 116     | LOC101928017 | LOC101928017     | 10         | 21.12      | 21.11    | +      | LOC101928017  | LOC101928017    | LOC101928017           |
| 117     | LOC101928018 | LOC101928018     | 10         | 21.11      | 21.10    | +      | LOC101928018  | LOC101928018    | LOC101928018           |
| 118     | LOC101928019 | LOC101928019     | 10         | 21.10      | 21.09    | +      | LOC101928019  | LOC101928019    | LOC101928019           |
| 119     | LOC101928020 | LOC101928020     | 10         | 21.09      | 21.08    | +      | LOC101928020  | LOC101928020    | LOC101928020           |
| 120     | LOC101928021 | LOC101928021     | 10         | 21.08      | 21.07    | +      | LOC101928021  | LOC101928021    | LOC101928021           |
| 121     | LOC101928022 | LOC101928022     | 10         | 21.07      | 21.06    | +      | LOC101928022  | LOC101928022    | LOC101928022           |
| 122     | LOC101928023 | LOC101928023     | 10         | 21.06      | 21.05    | +      | LOC101928023  | LOC101928023    | LOC101928023           |
| 123     | LOC101928024 | LOC101928024     | 10         | 21.05      | 21.04    | +      | LOC101928024  | LOC101928024    | LOC101928024           |
| 124     | LOC101928025 | LOC101928025     | 10         | 21.04      | 21.03    | +      | LOC101928025  | LOC101928025    | LOC101928025           |
| 125     | LOC101928026 | LOC101928026     | 10         | 21.03      | 21.02    | +      | LOC101928026  | LOC101928026    | LOC101928026           |
| 126     | LOC101928027 | LOC101928027     | 10         | 21.02      | 21.01    | +      | LOC101928027  | LOC101928027    | LOC101928027           |
| 127     | LOC101928028 | LOC101928028     | 10         | 21.01      | 21.00    | +      | LOC101928028  | LOC101928028    | LOC101928028           |
| 128     | LOC101928029 | LOC101928029     | 10         | 20.99      | 20.98    | +      | LOC101928029  | LOC101928029    | LOC101928029           |
| 129     | LOC101928030 | LOC101928030     | 10         | 20.98      | 20.97    | +      | LOC101928030  | LOC101928030    | LOC101928030           |
| 130     | LOC101928031 | LOC101928031     | 10         | 20.97      | 20.96    | +      | LOC101928031  | LOC101928031    | LOC101928031           |
| 131     | LOC101928032 | LOC101928032     | 10         | 20.96      | 20.95    | +      | LOC101928032  | LOC101928032    | LOC101928032           |
| 132     | LOC101928033 | LOC101928033     | 10         | 20.95      | 20.94    | +      | LOC101928033  | LOC101928033    | LOC101928033           |
| 133     | LOC101928034 | LOC101928034     | 10         | 20.94      | 20.93    | +      | LOC101928034  | LOC101928034    | LOC101928034           |
| 134     | LOC101928035 | LOC101928035     | 10         | 20.93      | 20.92    | +      | LOC101928035  | LOC101928035    | LOC101928035           |
| 135     | LOC101928036 | LOC101928036     | 10         | 20.92      | 20.91    | +      | LOC101928036  | LOC101928036    | LOC101928036           |
| 136     | LOC101928037 | LOC101928037     | 10         | 20.91      | 20.90    | +      | LOC101928037  | LOC101928037    | LOC101928037           |
| 137     | LOC101928038 | LOC101928038     | 10         | 20.90      | 20.89    | +      | LOC101928038  | LOC101928038    | LOC101928038           |
| 138     | LOC101928039 | LOC101928039     | 10         | 20.89      | 20.88    | +      | LOC101928039  | LOC101928039    | LOC101928039           |
| 139     | LOC101928040 | LOC101928040     | 10         | 20.88      | 20.87    | +      | LOC101928040  | LOC101928040    | LOC101928040           |
| 140     | LOC101928041 | LOC101928041     | 10         | 20.87      | 20.86    | +      | LOC101928041  | LOC101928041    | LOC101928041           |
| 141     | LOC101928042 | LOC101928042     | 10         | 20.86      | 20.85    | +      | LOC101928042  | LOC101928042    | LOC101928042           |
| 142     | LOC101928043 | LOC101928043     | 10         | 20.85      | 20.84    | +      | LOC101928043  | LOC101928043    | LOC101928043           |
| 143     | LOC101928044 | LOC101928044     | 10         | 20.84      | 20.83    | +      | LOC101928044  | LOC101928044    | LOC101928044           |
| 144     | LOC101928045 | LOC101928045     | 10         | 20.83      | 20.82    | +      | LOC101928045  | LOC101928045    | LOC101928045           |
| 145     | LOC101928046 | LOC101928046     | 10         | 20.82      | 20.81    | +      | LOC101928046  | LOC101928046    | LOC101928046           |
| 146     | LOC101928047 | LOC101928047     | 10         | 20.81      | 20.80    | +      | LOC101928047  | LOC101928047    | LOC101928047           |
| 147     | LOC101928048 | LOC101928048     | 10         | 20.80      | 20.79    | +      | LOC101928048  | LOC101928048    | LOC101928048           |
| 148     | LOC101928049 | LOC101928049     | 10         | 20.79      | 20.78    | +      | LOC101928049  | LOC101928049    | LOC101928049           |
| 149     | LOC101928050 | LOC101928050     | 10         | 20.78      | 20.77    | +      | LOC101928050  | LOC101928050    | LOC101928050           |
| 150     | LOC101928051 | LOC101928051     | 10         | 20.77      | 20.76    | +      | LOC101928051  | LOC101928051    | LOC101928051           |
| 151     | LOC101928052 | LOC101928052     | 10         | 20.76      | 20.75    | +      | LOC101928052  | LOC101928052    | LOC101928052           |
| 152     | LOC101928053 | LOC101928053     | 10         | 20.75      | 20.74    | +      | LOC101928053  | LOC101928053    | LOC101928053           |
| 153     | LOC101928054 | LOC101928054     | 10         | 20.74      | 20.73    | +      | LOC101928054  | LOC101928054    | LOC101928054           |
| 154     | LOC101928055 | LOC101928055     | 10         | 20.73      | 20.72    | +      | LOC101928055  | LOC101928055    | LOC101928055           |
| 155     | LOC101928056 | LOC101928056     | 10         | 20.72      | 20.71    | +      | LOC101928056  | LOC101928056    | LOC101928056           |
| 156     | LOC101928057 | LOC101928057     | 10         | 20.71      | 20.70    | +      | LOC101928057  | LOC101928057    | LOC101928057           |
| 157     | LOC101928058 | LOC101928058     | 10         | 20.70      | 20.69    | +      | LOC101928058  | LOC101928058    | LOC101928058           |
| 158     | LOC101928059 | LOC101928059     | 10         | 20.69      | 20.68    | +      | LOC101928059  | LOC101928059    | LOC101928059           |
| 159     | LOC101928060 | LOC101928060     | 10         | 20.68      | 20.67    | +      | LOC101928060  | LOC101928060    | LOC101928060           |
| 160     | LOC101928061 | LOC101928061     | 10         | 20.67      | 20.66    | +      | LOC101928061  | LOC101928061    | LOC101928061           |
| 161     | LOC101928062 | LOC101928062     | 10         | 20.66      | 20.65    | +      | LOC101928062  | LOC101928062    | LOC101928062           |
| 162     | LOC101928063 | LOC101928063     | 10         | 20.65      | 20.64    | +      | LOC101928063  | LOC101928063    | LOC101928063           |
| 163     | LOC101928064 | LOC101928064     | 10         | 20.64      | 20.63    | +      | LOC101928064  | LOC101928064    | LOC101928064           |
| 164     | LOC101928065 | LOC101928065     | 10         | 20.63      | 20.62    | +      | LOC101928065  | LOC101928065    | LOC101928065           |
| 165     | LOC101928066 | LOC101928066     | 10         | 20.62      | 20.61    | +      | LOC101928066  | LOC101928066    | LOC101928066           |
| 166     | LOC101928067 | LOC101928067     | 10         | 20.61      | 20.60    | +      | LOC101928067  | LOC101928067    | LOC101928067           |
| 167     | LOC101928068 | LOC101928068     | 10         | 20.60      | 20.59    | +      | LOC101928068  | LOC101928068    | LOC101928068           |
| 168     | LOC101928069 | LOC101928069     | 10         | 20.59      | 20.58    | +      | LOC101928069  | LOC101928069    | LOC101928069           |
| 169     | LOC101928070 | LOC101928070     | 10         | 20.58      | 20.57    | +      | LOC101928070  | LOC101928070    | LOC101928070           |
| 170     | LOC101928071 | LOC101928071     | 10         | 20.57      | 20.56    | +      | LOC101928071  | LOC101928071    | LOC101928071           |
| 171     | LOC101928072 | LOC101928072     | 10         | 20.56      | 20.55    | +      | LOC101928072  | LOC101928072    | LOC101928072           |
| 172     | LOC101928073 | LOC101928073     | 10         | 20.55      | 20.54    | +      | LOC101928073  | LOC101928073    | LOC101928073           |
| 173     | LOC101928074 | LOC101928074     | 10         | 20.54      | 20.53    | +      | LOC101928074  | LOC101928074    | LOC101928074           |
| 174     | LOC101928075 | LOC101928075     | 10         | 20.53      | 20.52    | +      | LOC101928075  | LOC101928075    | LOC101928075           |
| 175     | LOC101928076 | LOC101928076     | 10         | 20.52      | 20.51    | +      | LOC101928076  | LOC101928076    | LOC101928076           |
| 176     | LOC101928077 | LOC101928077     | 10         | 20.51      | 20.50    | +      | LOC101928077  | LOC101928077    | LOC101928077           |
| 177     | LOC101928078 | LOC101928078     | 10         | 20.50      | 20.49    | +      | LOC101928078  | LOC101928078    | LOC101928078           |
| 178     | LOC101928079 | LOC101928079     | 10         | 20.49      | 20.48    | +      | LOC101928079  | LOC101928079    | LOC101928079           |
| 179     | LOC101928080 | LOC101928080     | 10         | 20.48      | 20.47    | +      | LOC101928080  | LOC101928080    | LOC101928080           |
| 180     | LOC101928081 | LOC101928081     | 10         | 20.47      | 20.46    | +      | LOC101928081  | LOC101928081    | LOC101928081           |
| 181     | LOC101928082 | LOC101928082     | 10         | 20.46      | 20.45    | +      | LOC101928082  | LOC101928082    | LOC101928082           |
| 182     | LOC101928083 | LOC101928083     | 10         | 20.45      | 20.44    | +      | LOC101928083  | LOC101928083    | LOC101928083           |
| 183     | LOC101928084 | LOC101928084     | 10         | 20.44      | 20.43    | +      | LOC101928084  | LOC101928084    | LOC101928084           |
| 184     | LOC101928085 | LOC101928085     | 10         | 20.43      | 20.42    | +      | LOC101928085  | LOC101928085    | LOC101928085           |
| 185     | LOC101928086 | LOC101928086     | 10         | 20.42      | 20.41    | +      | LOC101928086  | LOC101928086    | LOC101928086           |
| 186     | LOC101928087 | LOC101928087     | 10         | 20.41      | 20.40    | +      | LOC101928087  | LOC101928087    | LOC101928087           |
| 187     | LOC101928088 | LOC101928088     | 10         | 20.40      | 20.39    | +      | LOC101928088  | LOC101928088    | LOC101928088           |
| 188     | LOC101928089 | LOC101928089     | 10         | 20.39      | 20.38    | +      | LOC101928089  | LOC101928089    | LOC101928089           |
| 189     | LOC101928090 | LOC101928090     | 10         | 20.38      | 20.37    | +      | LOC101928090  | LOC101928090    | LOC101928090           |
| 190     | LOC101928091 | LOC101928091     | 10         | 20.37      | 20.36    | +      | LOC101928091  | LOC101928091    | LOC101928091           |
| 191     | LOC101928092 | LOC101928092     | 10         | 20.36      | 20.35    | +      | LOC101928092  | LOC101928092    | LOC101928092           |
| 192     | LOC101928093 | LOC101928093     | 10         | 20.35      | 20.34    | +      | LOC101928093  | LOC1019         |                        |
